# Supplementary material for: Experimental and theoretical study of catalytic dye degradation and bactericidal potential of multiple phase Bi and MoS2 doped SnO2 quantum dots
Source: Royal Society of Chemistry journal article supplement (doi:10.1039/d3ra00698k), 2023-01-01
Supplement: d3ra00698k1.pdf [file d3ra00698k1.pdf]

## Supplementary Materials

### **Experimental and theoretical study of catalytic dye degradation and bactericidal potential of multiple phases Bi/MoS<sub>2</sub> doped SnO<sub>2</sub> quantum dots**

Ayesha Habib<sup>a</sup>, Muhammad Ikram<sup>a\*</sup>, Ali Haider<sup>b</sup>, Anwar Ul-Hamid<sup>c</sup>, Iram Shahzadi<sup>d</sup>, Junaid Haider<sup>e</sup>, Mohammed Benali Kanoun<sup>f</sup>, Souraya Goumri-Said<sup>g</sup>, Walid Nabgan<sup>h\*</sup>

<sup>a</sup>Solar Cell Applications Research Lab, Department of Physics, Government College University Lahore, Lahore, 54000, Punjab, Pakistan

<sup>b</sup>Department of Clinical Sciences, Faculty of Veterinary and Animal Sciences, Muhammad Nawaz Shareef University of Agriculture (MNSUA) Multan, 66000, Pakistan

<sup>c</sup>Center for Engineering Research, Research Institute, King Fahd University of Petroleum & Minerals, Dhahran, 31261, Saudi Arabia

<sup>d</sup>Faculty of Pharmacy, The University of Lahore, 54000, Pakistan

<sup>e</sup>Tianjin Institute of Industrial Biotechnology, Chinese Academy of Sciences, Tianjin 300308, China.

<sup>f</sup>Department of Mathematics and Sciences, College of Humanities and Sciences, Prince Sultan University, P.O. Box 66833, Riyadh 11586, Saudi Arabia

<sup>g</sup>Physics Department, College of Science and General Studies, Alfaisal University, P.O. Box 50927, Riyadh 11533, Saudi Arabia

<sup>h</sup>Departament d'Enginyeria Química, Universitat Rovira i Virgili, Av Països Catalans 26, 43007, Tarragona, Spain.

\*Corresponding authors emails: <sup>a</sup>dr.muhammadikram@gcu.edu.pk,

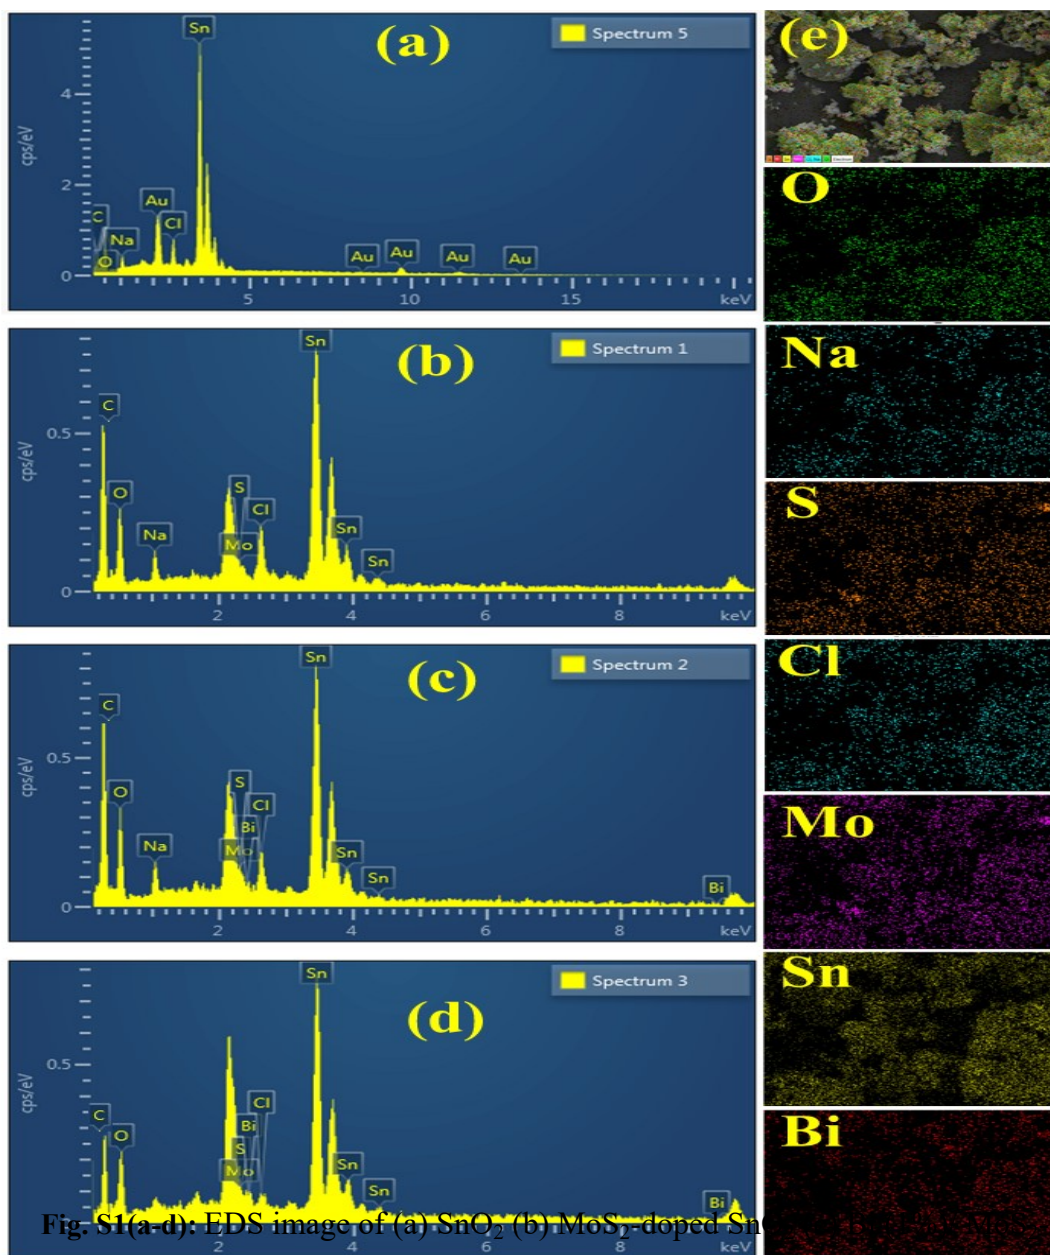

Fig. S1(a-d): EDS image of (a) SnO<sub>2</sub> (b) MoS<sub>2</sub>-doped SnO<sub>2</sub> (c) Bi (3%)-doped SnO<sub>2</sub> (d) Bi (3%)/ MoS<sub>2</sub>-doped SnO<sub>2</sub> and (e) mapping of Bi/MoS<sub>2</sub>-doped SnO<sub>2</sub>.

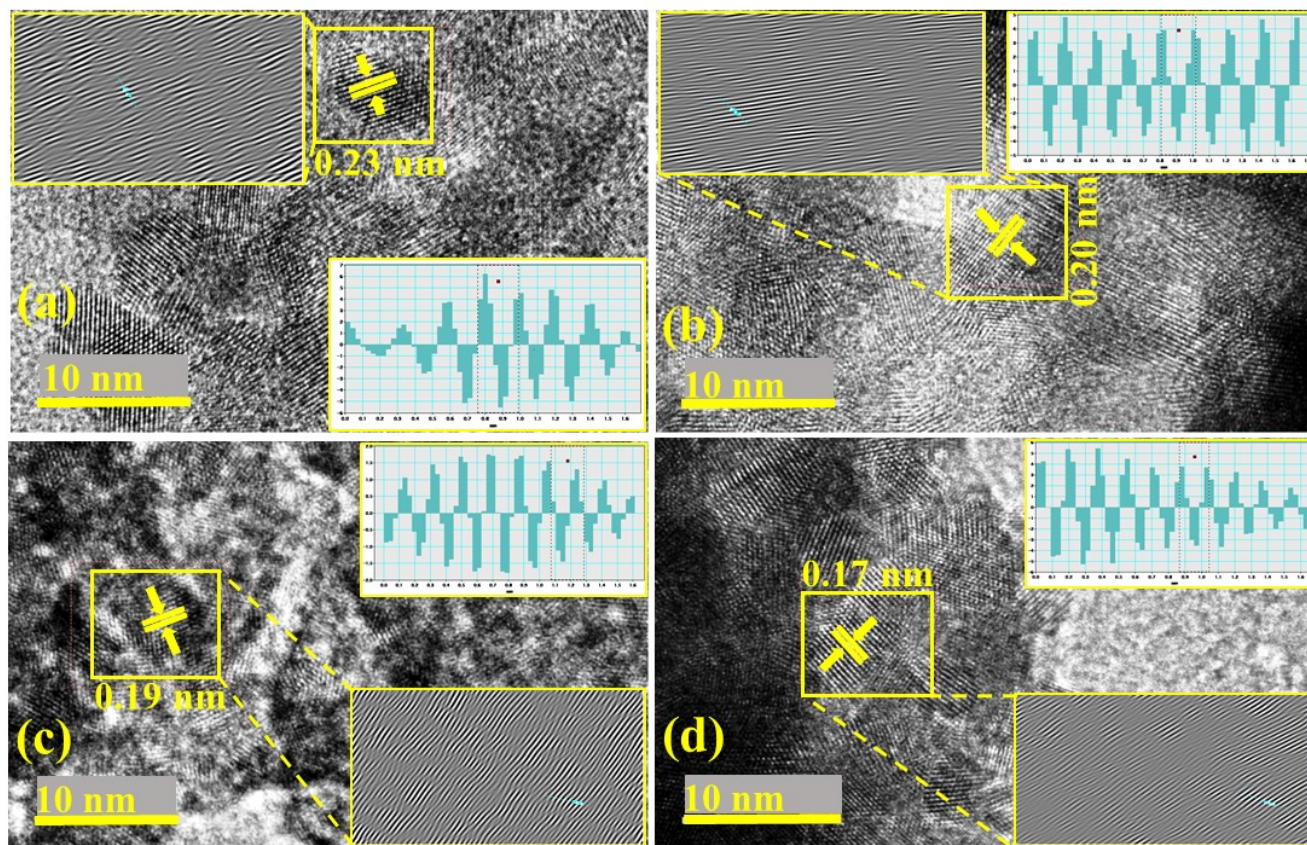

Fig. S2: (a-d) interlayer d-spacing of SnO<sub>2</sub>, MoS<sub>2</sub>-doped SnO<sub>2</sub>, and Bi (1% and 3%)/MoS<sub>2</sub>-doped SnO<sub>2</sub> QDs.

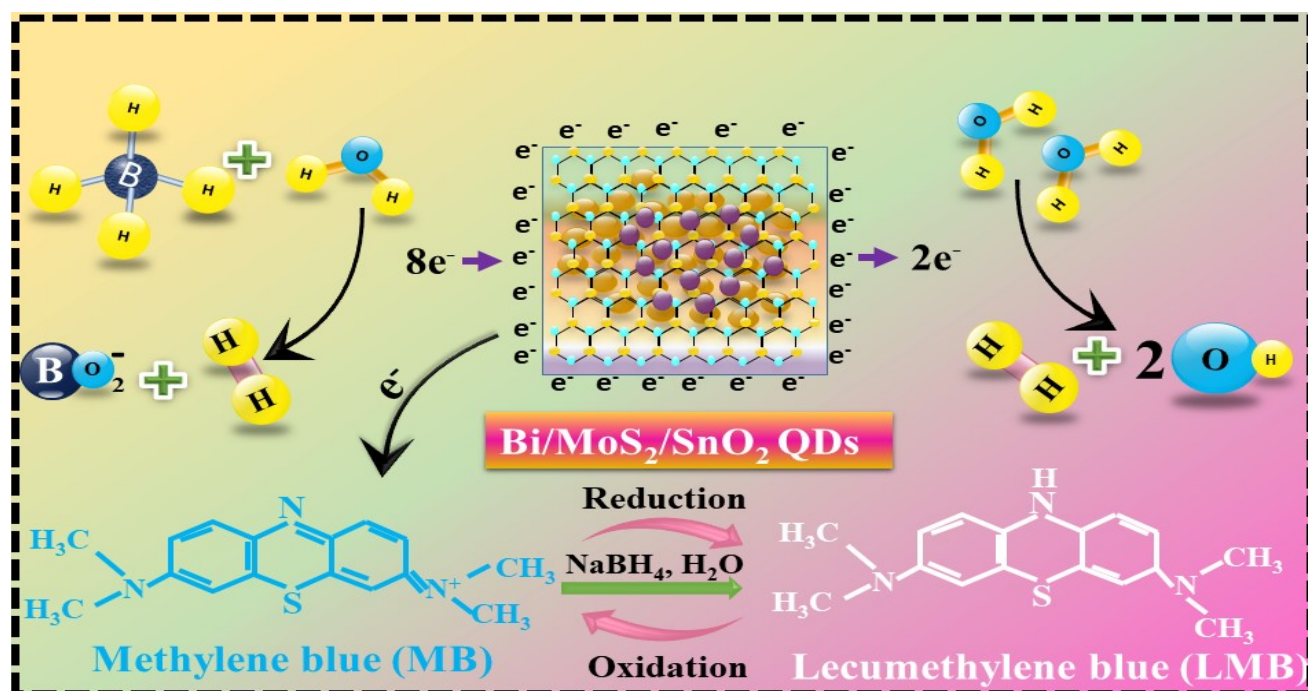

Fig. S3: Catalysis mechanism of Bi/MoS<sub>2</sub>-doped SnO<sub>2</sub> QDs

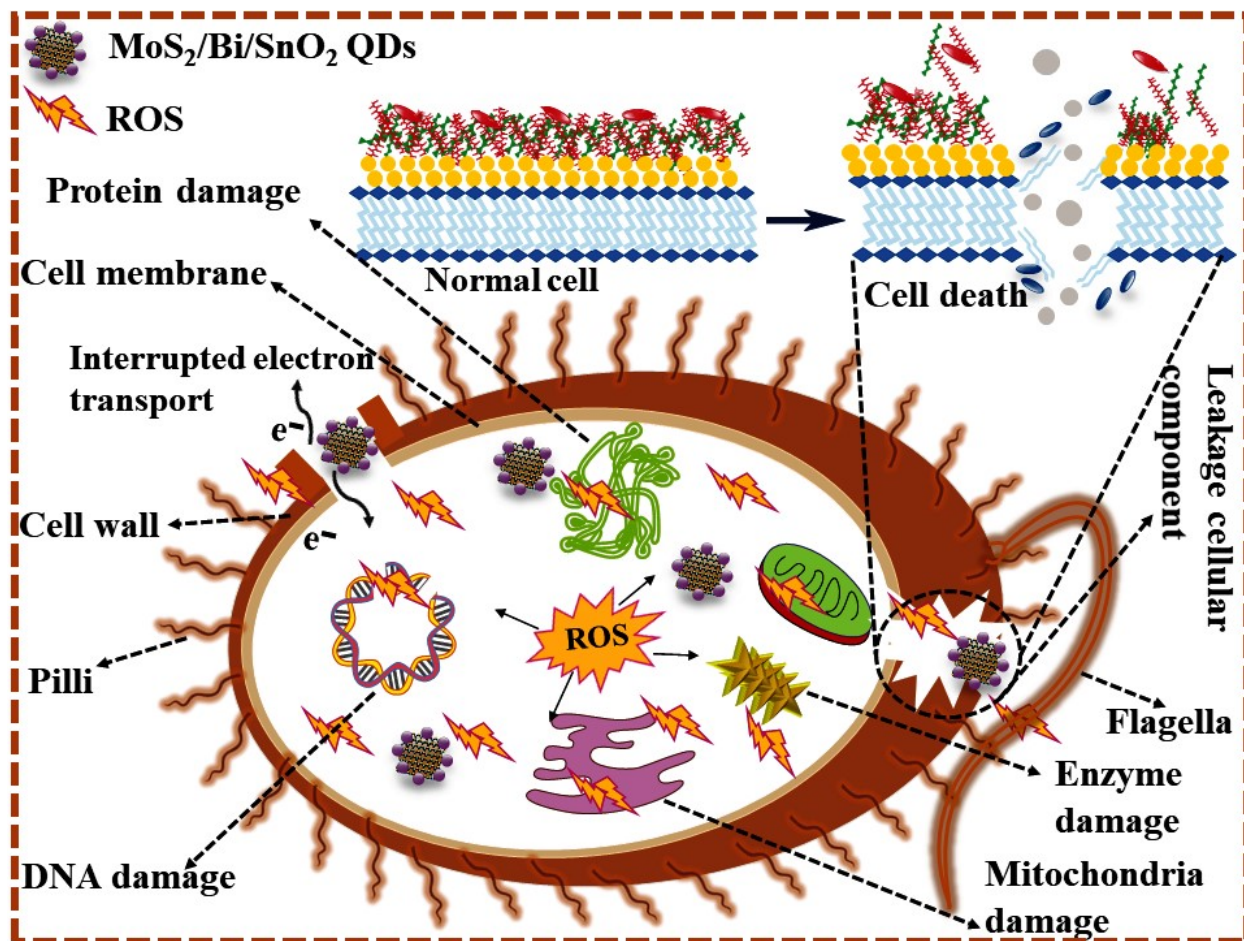

FIG. S4: Schematic of mechanism for antimicrobial activity of the prepared Bi/MoS<sub>2</sub>-doped SnO<sub>2</sub>.
